# Supplementary material
Source: Springer Nature journal article supplement (https://www.springermedizin.de/resource/supplementary/12986_2011_416_MOESM6_ESM.pdf/25656054)

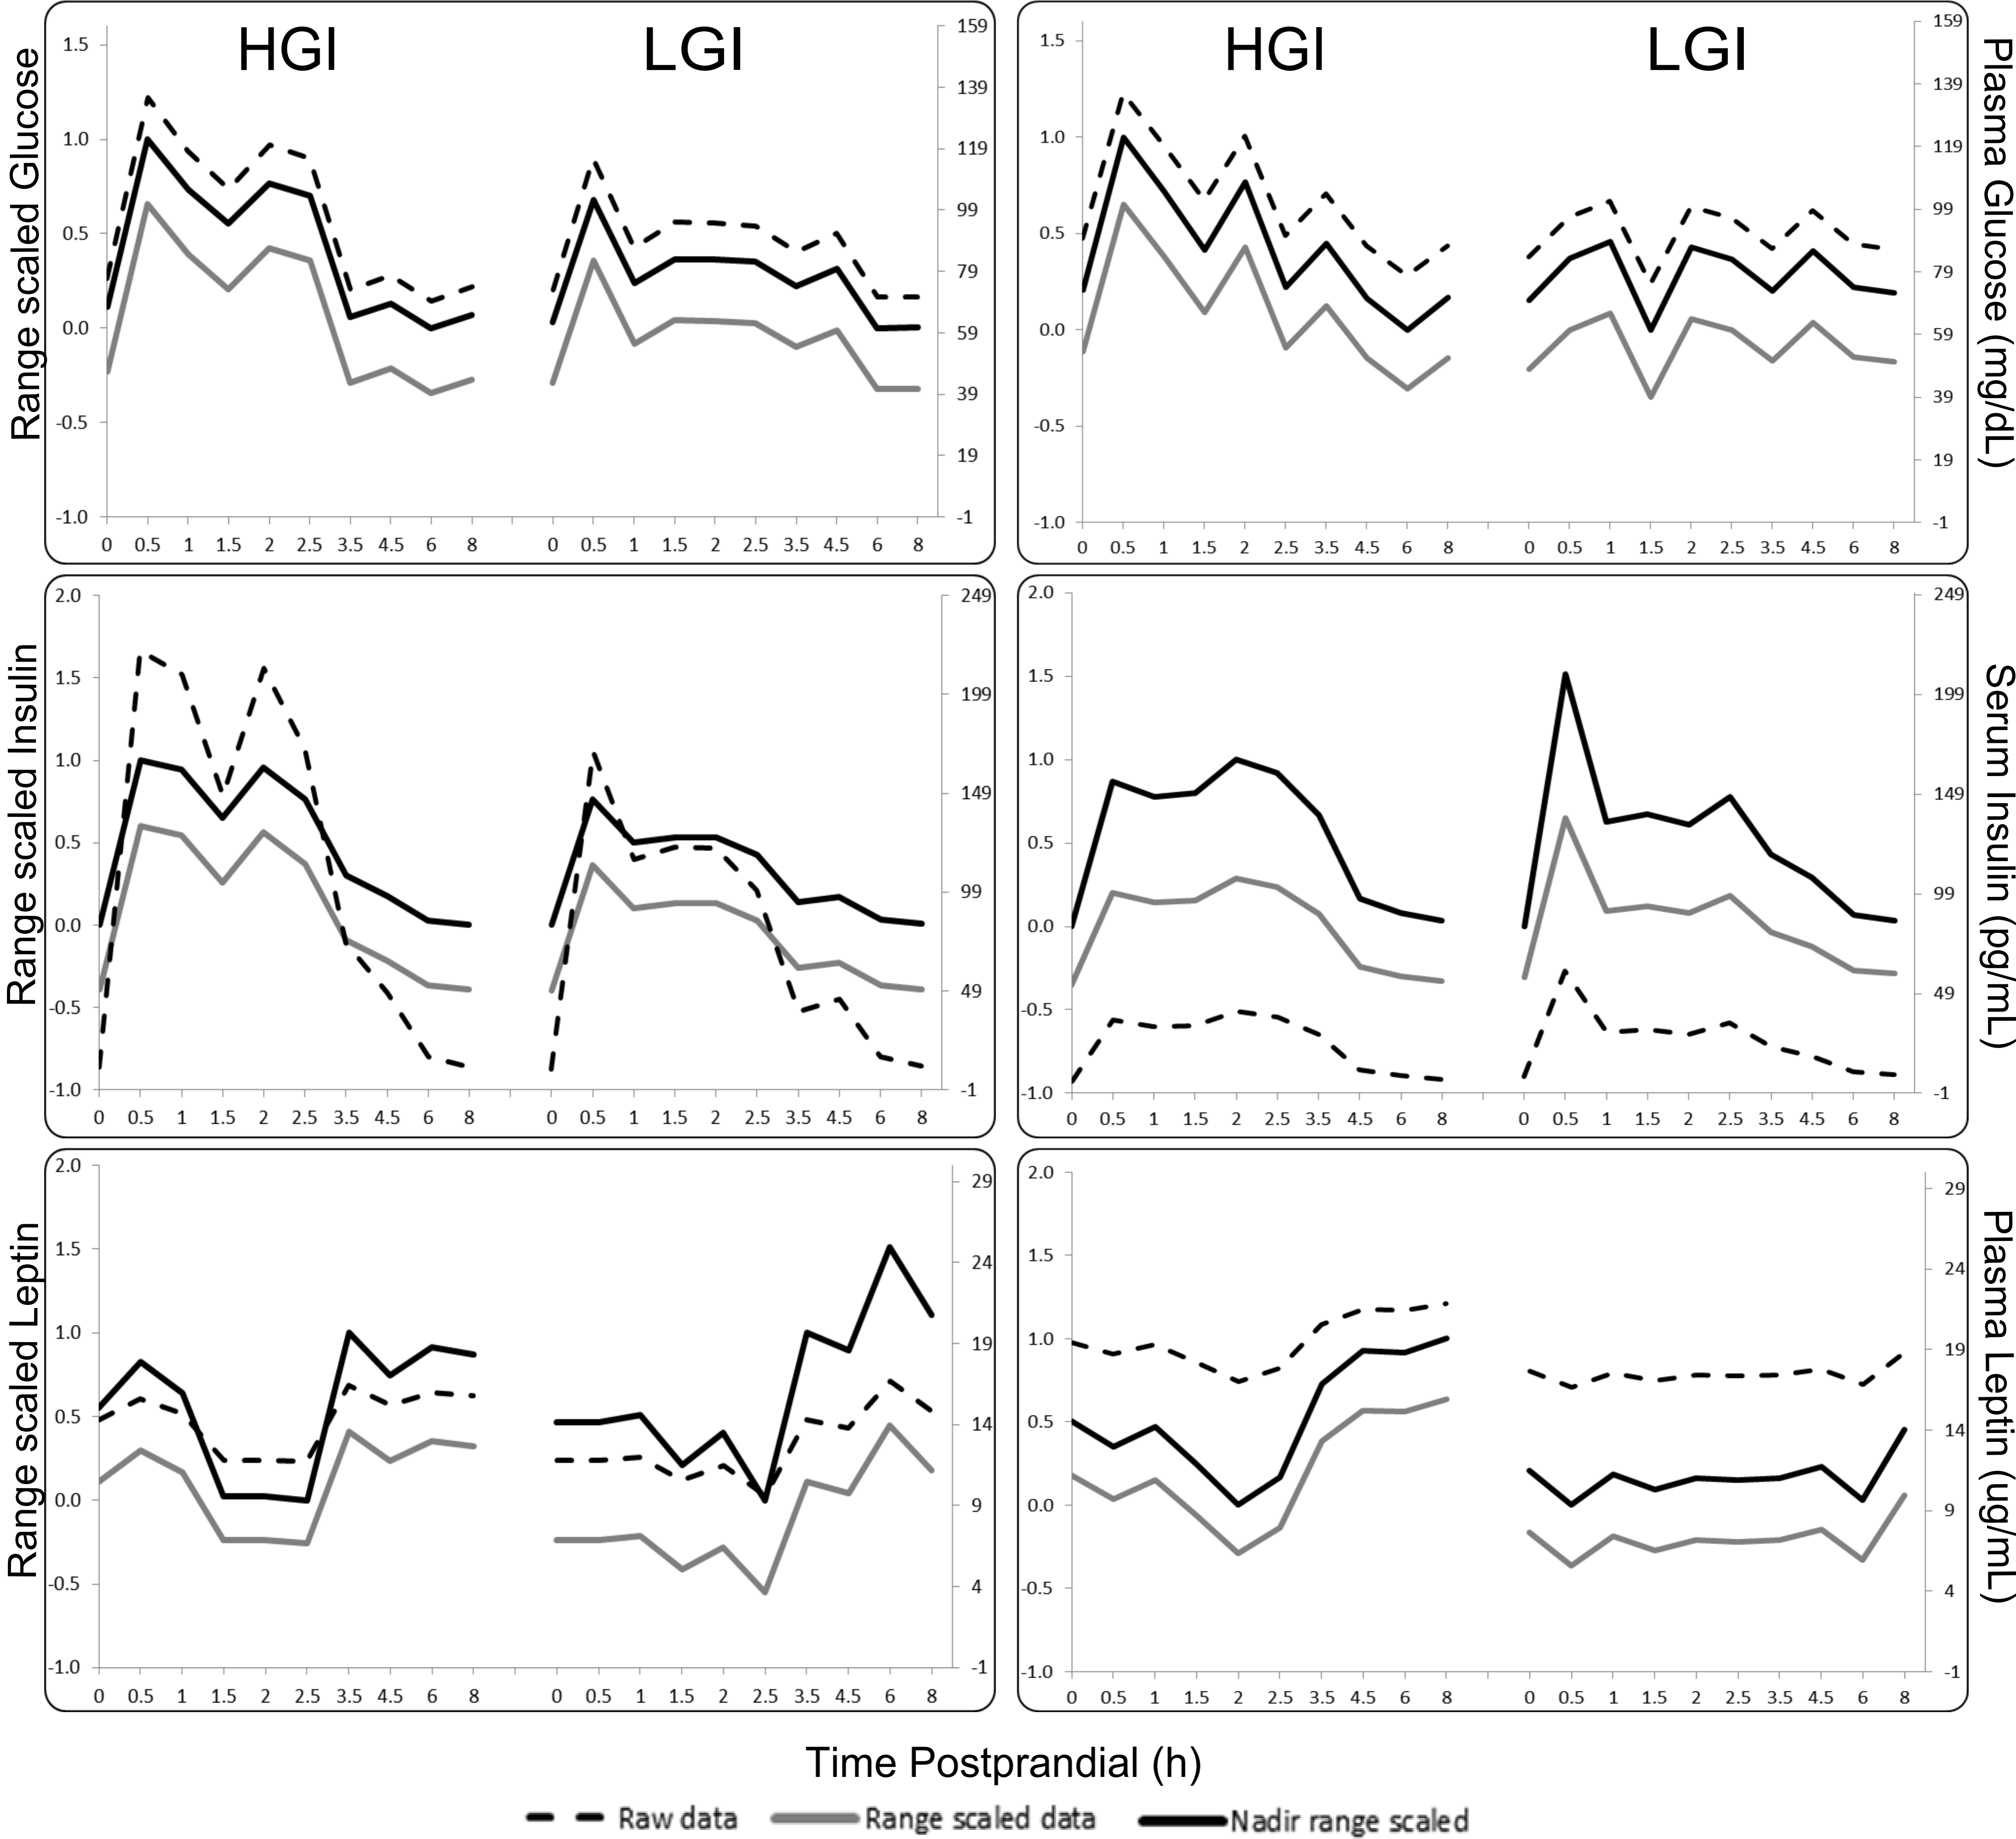

Supplement: MOESM6 [file 25656054]
